# Supplementary material for: The mechanism of cytoplasmic incompatibility is conserved in Wolbachia-infected Aedes aegypti mosquitoes deployed for arbovirus control
Source: PLoS Biol. 2024 Mar 28;22(3):e3002573. doi: 10.1371/journal.pbio.3002573 (PMC11014437; doi:10.1371/journal.pbio.3002573)
Supplement: S1 Data — (XLSX) [file pbio.3002573.s008.xlsx]

## Sheet: Fig. 2B
Fig. 2B
Experiment: Quantification of core-Histone signal intensity from elongating spermatids
wMel- males	#	Area	Mean	IntDens	RawIntDens	CTCF			wMel+ males	#	Area	Mean	IntDens	RawIntDens	CTCF
	1	16.291	57.477	936.368	53913	3309.37				1	22.266	71.644	1595.21	91847	4124.99
	2	14.884	58.788	875.024	50381	3384.91				2	31.263	64.151	2005.52	115471	3693.54
	3	15.979	55.78	891.298	51318	3211.59				3	32.774	48.686	1595.63	91871	2803.17
	4	24.975	39.086	976.194	56206	2250.49				4	35.483	66.889	2373.44	136655	3851.28
	5	21.12	35.602	751.901	43292	2049.81				5	38.696	61.619	2384.42	137287	3547.83
	6	14.919	45.646	681.005	39210	2628.19				6	38.071	49.037	1866.9	107490	2823.41
	7	10.959	45.309	496.555	28590	2608.81				7	26.035	44.462	1157.57	66649	2559.98
	8	10.612	37.635	399.38	22995	2166.89				8	37.064	50.95	1888.38	108727	2933.49
	9	27.146	48.558	1318.17	75896	2795.84				9	20.251	64.89	1314.11	75662	3736.21
	10	23.846	32.421	773.125	44514	1866.73				10	18.445	28.429	524.379	30192	1636.87
	11	13.13	29.765	390.818	22502	1713.79				11	18.671	49.728	928.466	53458	2863.16
	12	14.798	26.526	392.52	22600	1527.23				12	28.397	42.514	1207.26	69510	2447.79
	13	31.679	34.94	1106.87	63730	2011.74				13	32.895	44.923	1477.75	85084	2586.53
	14	35.223	36.428	1283.07	73875	2097.35				14	34.389	36.833	1266.66	72930	2120.74
	15	32.93	39.492	1300.46	74876	2273.79				15	35.57	40.277	1432.65	82487	2319
	16	19.418	53.195	1032.92	59472	3062.73				16	35.83	48.867	1750.93	100813	2813.65
	17	15.006	13.985	209.859	12083	805.211				17	23.551	70.481	1659.91	95572	4058.09
	18	26.4	15.815	417.513	24039	910.568				18	18.237	77.973	1421.96	81872	4489.33
	19	14.433	16.61	239.732	13803	956.35				19	21.554	78.533	1692.68	97459	4521.62
	20	17.038	26.022	443.374	25528	1498.3				20	23.048	66.506	1532.81	88254	3829.14
	21	27.025	15.933	430.591	24792	917.373				21	22.092	79.968	1766.67	101719	4604.34
	22	28.675	12.326	353.442	20350	709.677				22	38.106	80.254	3058.13	176077	4620.72
	23	15.77	12.546	197.858	11392	722.384				23	16.621	65.728	1092.49	62902	3784.49
	24	14.572	12.411	180.854	10413	714.59				24	14.728	85.302	1256.34	72336	4911.46
	25	18.028	14.755	266.01	15316	849.567				25	18.011	63.511	1143.88	65861	3656.71
	26	18.045	19.95	360.007	20728	1148.68				26	25.114	71.313	1790.97	103118	4106
	27	13.426	23.089	309.987	17848	1329.36				27	16.066	83.648	1343.84	77374	4816.01
	28	22.787	14.108	321.484	18510	812.305				28	20.581	61.129	1258.11	72438	3519.65
	29	39.356	21.129	831.569	47879	1216.56				29	14.554	65.378	951.548	54787	3764.39
	30	18.844	14.819	279.262	16079	853.269				30	37.428	47.251	1768.51	101825	2720.56
	31	25.948	15.726	408.047	23494	905.426				31	20.599	38.055	783.876	45133	2191.03
	32	20.79	18.923	393.406	22651	1089.51				32	21.467	43.533	934.527	53807	2506.5
	33	32.114	17.001	545.967	31435	978.857				33	20.599	43.634	898.801	51750	2512.26
	34	20.703	18.466	382.307	22012	1063.23				34	18.132	36.233	656.985	37827	2086.2
	35	15.423	13.941	215.018	12380	802.697				35	10.942	86.549	947.015	54526	4983.18
	36	17.681	18.077	319.608	18402	1040.78				36	11.272	101.596	1145.18	65936	5849.54
	37	30.759	17.992	553.401	31863	1035.89				37	17.194	56.495	971.4	55930	3252.88
	38	9.084	12.505	113.588	6540	719.947				38	23.186	94.213	2184.48	125775	5424.61
	39	24.715	16.415	405.685	23358	945.094				39	21.658	104.222	2257.25	129965	6000.78
	40	11.828	12.068	142.731	8218	694.792				40	18.08	68.631	1240.87	71445	3951.6
	41	9.587	12.402	118.902	6846	714.092				41	15.857	85.559	1356.71	78115	4926.22
	42	25.162	36.748	924.636	54515	2166.56				42	17.438	78.303	1365.41	78616	4508.32
	43	19.997	32.708	654.058	38562	1928.39				43	33.399	83.928	2803.11	161394	4832.3
	44	29.482	34.012	1002.73	59119	2005.26				44	38.384	91.876	3526.51	203045	5289.83
	45	23.086	37.924	875.493	51617	2235.86				45	29.908	106.707	3191.39	183750	6143.84
	46	17.438	37.294	650.321	38342	2198.76				46	15.076	101.081	1523.85	87738	5819.71
	47	33.868	42.111	1426.22	84087	2482.79				47	20.46	80.939	1655.98	95346	4660.12
	48	20.918	36.098	755.107	44520	2128.31				48	40.589	76.784	3116.61	179444	4421
	49	22.521	36.225	815.821	48099	2135.74				49	30.134	87.949	2650.22	152591	5063.75
	50	21.946	41.409	908.756	53578	2441.36				50	27.268	82.361	2245.82	129307	4742.08
	51	24.918	32.686	814.462	48019	1927.08				51	20.494	77.831	1595.09	91840	4481.31
	52	33.079	33.785	1117.59	65891	1991.93				52	20.633	76.724	1583.07	91148	4417.58
	53	33.186	35.742	1186.13	69932	2107.27				53	19.018	55.877	1062.67	61185	3217.22
	54	28.958	37.164	1076.18	63450	2191.1				54	21.432	74.094	1588	91432	4266.14
	55	25.757	15.531	400.025	23584	915.635				55	29.7	63.827	1895.63	109144	3674.88
	56	25.279	37.967	959.751	56585	2238.42				56	10.595	80.123	848.868	48875	4613.03
	57	24.51	41.39	1014.48	59812	2440.31				57	22.665	78.323	1775.23	102212	4509.68
	58	28.342	27.612	782.575	46139	1627.94				58	25.166	79.563	2002.32	115287	4581.06
	59	17.158	13.334	228.783	13488	786.106				59	23.985	86.876	2083.76	119976	5002.13
	60	18.028	36.126	651.276	38398	2129.91				60	38.835	85.685	3327.58	191591	4933.46
	61	20.837	30.048	626.108	36914	1771.56				61	39.808	61.894	2463.84	141860	3563.61
	62	18.776	34.659	650.749	38367	2043.41				62	35.101	104.748	3676.76	211696	6031.05
										63	35.969	71.095	2557.23	147237	4093.44
										64	27.285	52.409	1429.99	82334	3017.56
						1682.06				65	26.869	61.055	1640.45	94452	3515.28
										66	21.259	72.434	1539.84	88659	4170.42
										67	16.309	81.854	1334.93	76861	4712.8
										68	22.7	59.777	1356.94	78128	3441.76
										69	26.921	50.072	1347.98	77612	2882.95
										70	20.112	60.681	1220.44	70269	3493.88
										71	17.386	43.893	763.104	43937	2527.15
										72	23.395	69.573	1627.65	93715	4005.77
										73	9.987	70.677	705.824	40639	4069.19
										74	30.516	48.503	1480.1	85219	2792.6
										75	19.904	57.25	1139.49	65608	3296.22
										76	10.091	54.811	553.088	31845	3155.78
										77	17.559	50.076	879.297	50627	2883.25
										78	12.175	44.466	541.382	31171	2560.25
										79	11.046	60.892	672.616	38727	3505.98
										80	11.046	60.892	672.616	38727	3505.98
										81	17.959	55.05	988.629	56922	3169.55
										82	12.592	53.799	677.427	39004	3097.52
										83	7.295	108.94	794.679	45755	6272.1
										84	17.056	46.133	786.829	45303	2656.13
										85	12.557	40.425	507.619	29227	2327.55
										86	18.393	49.03	901.806	51923	2822.98
										87	26.643	83.154	2215.46	127559	4787.71
															3833.16

## Sheet: Fig. 2C
Fig. 2C
Experiment: Mature sperm count with retained histone puncta per seminal vesicle
wMel- males	#	Total mature sperm observed	Total mature sperm observed with punctae	% sperm with pucta		wMel+ males	#	Total mature sperm observed	Total mature sperm observed with punctae	% sperm with pucta
	1	85	0	0			1	95	82	86.3158
	2	72	11	15.2778			2	87	80	91.954
	3	28	0	0			3	38	38	100
	4	42	0	0			4	74	69	93.2432
	5	60	43	71.6667			5	66	65	98.4848
	6	67	0	0			6	102	83	81.3725
	7	98	0	0			7	111	108	97.2973
	8	76	0	0			8	83	72	86.747
	9	113	0	0			9	59	50	84.7458
	10	68	5	7.35294			10	89	89	100

## Sheet: Fig. 2D
Fig. 2D
Experiment: CMA3 fluorescence count per mature sperm head isolated from male seminal vesicles
wMel- males	#	Area	Mean	IntDens	RawIntDens	CTCF					wMel+ males	#	Area	Mean	IntDens	RawIntDens	CTCF
	1	58.077	29.95	1739.38	10093	173.787						1	85.478	37.377	3194.93	18539	216.886
	2	38.086	27.855	1060.9	6156	161.634						2	52.39	44.076	2309.12	13399	255.755
	3	40.154	43.116	1731.28	10046	250.187						3	46.014	39.993	1840.2	10678	232.06
	4	34.467	51.575	1777.64	10315	299.272						4	52.562	41.184	2164.7	12561	238.975
	5	28.952	43.101	1247.88	7241	250.104						5	53.079	57.497	3051.89	17709	333.635
	6	21.542	36.424	784.643	4553	211.355						6	63.075	81.992	5171.61	30009	475.767
	7	42.222	28.641	1209.28	7017	166.193						7	41.533	55.324	2297.75	13333	321.022
	8	29.814	36.607	1091.4	6333	212.417						8	29.814	87.41	2606.05	15122	507.211
	9	70.83	29.538	2092.15	12140	171.396						9	106.331	72.057	7661.86	44459	418.119
	10	46.186	69.996	3232.84	18759	406.162						10	40.154	136.103	5465.1	31712	789.759
	11	37.741	56.918	2148.16	12465	330.277						11	29.986	63.425	1901.89	11036	368.038
	12	27.401	62.208	1704.57	9891	360.972						12	61.007	56.859	3468.77	20128	329.929
	13	69.279	54.229	3756.91	21800	314.67						13	51.184	45.872	2347.9	13624	266.177
	14	49.977	66.786	3337.79	19368	387.538						14	78.068	52.042	4062.8	23575	301.98
	15	47.737	68.625	3275.92	19009	398.203						15	62.041	55.144	3421.2	19852	319.982
	16	49.46	30.937	1530.16	8879	179.519						16	61.868	64.167	3969.92	23036	372.341
	17	71.002	26.328	1869.32	10847	152.77						17	43.429	47.028	2042.35	11851	272.882
	18	52.907	48.668	2574.86	14941	282.401						18	39.12	66.273	2592.61	15044	384.56
	19	53.941	34.901	1882.59	10924	202.518						19	78.068	70.669	5516.97	32013	410.066
	20	38.086	33.122	1261.49	7320	192.197						20	40.671	68.445	2783.73	16153	397.163
	21	30.848	42.553	1312.68	7617	246.92						21	49.288	56.703	2794.76	16217	329.025
	22	73.243	27.346	2002.88	11622	158.677						22	30.848	78.603	2424.76	14070	456.107
	23	48.082	57.118	2746.34	15936	331.434						23	61.007	57.085	3482.55	20208	331.241
	24	36.535	23.467	857.368	4975	136.171						24	58.077	50.994	2961.58	17185	295.9
	25	45.669	27.747	1267.18	7353	161.006						25	38.775	57.782	2240.53	13001	335.293
	26	39.12	31.577	1235.3	7168	183.231						26	62.041	77.106	4783.68	27758	447.414
	27	70.14	25.44	1784.36	10354	147.619						27	48.426	54.587	2643.45	15339	316.751
	28	54.458	31.127	1695.09	9836	180.616						28	19.302	93.384	1802.45	10459	541.861
	29	71.691	26.966	1933.26	11218	156.477						29	60.317	81.877	4938.61	28657	475.107
	30	40.326	29.021	1170.33	6791	168.403						30	68.934	43.94	3028.97	17576	254.969
	31	60.145	32.725	1968.24	11421	189.891						31	55.664	49.492	2754.95	15986	287.187
	32	40.326	27.816	1121.73	6509	161.41						32	72.381	55.757	4035.75	23418	323.538
	33	26.712	33.994	908.035	5269	197.252						33	39.637	75.826	3005.53	17440	439.993
	34	54.63	18.23	995.926	5779	105.784						34	39.12	77.392	3027.59	17568	449.08
	35	56.871	19.445	1105.88	6417	112.834						35	46.014	69.82	3212.68	18642	405.138
	36	43.946	26.188	1150.86	6678	151.959						36	80.308	50.496	4055.22	23531	293.009
	37	48.426	28.274	1369.2	7945	164.065						37	71.519	50.311	3598.19	20879	291.936
	38	64.281	23.249	1494.49	8672	134.908						38	79.274	77.446	6139.45	35625	449.391
	39	66.694	32.995	2200.55	12769	191.457						39	57.905	75.759	4386.8	25455	439.599
	40	40.154	39.549	1588.07	9215	229.491						40	59.973	72.713	4360.77	25304	421.923
	41	51.011	28.334	1445.38	8387	164.416						41	55.664	47.034	2618.12	15192	272.923
	42	73.932	35.618	2633.28	15280	206.676						42	42.394	46.963	1990.99	11553	272.515
	43	33.088	49.521	1638.56	9508	287.355						43	55.837	52.355	2923.32	16963	303.795
	44	40.671	42.737	1738.17	10086	247.99						44	73.587	57.63	4240.83	24608	334.407
	45	96.508	22.77	2197.45	12751	132.124						45	47.565	85.819	4081.93	23686	497.971
	46	64.109	36.266	2324.98	13491	210.438						46	28.263	63.03	1781.43	10337	365.743
	47	107.193	26.378	2827.51	16407	153.06						47	52.735	37.127	1957.9	11361	215.436
	48	108.227	25.57	2767.36	16058	148.373						48	70.14	93.182	6535.82	37925	540.704
	49	74.449	29.447	2192.28	12721	170.869						49	65.832	87.346	5750.14	33366	506.836
	50	27.057	52.089	1409.36	8178	302.251						50	103.918	56.187	5838.89	33881	326.036
	51	27.057	52.089	1409.36	8178	302.251						51	37.397	57.309	2143.16	12436	332.54
	52	50.667	18.075	915.79	5314	104.881						52	42.567	50.911	2167.12	12575	295.417
	53	66.866	30.835	2061.82	11964	178.925						53	43.256	66.717	2885.93	16746	387.137
	54	51.011	30.635	1562.74	9068	177.766						54	57.043	50.592	2885.93	16746	293.568
	55	75.138	31.539	2369.78	13751	183.01						55	42.222	69.637	2940.21	17061	404.078
	56	46.875	28.482	1335.08	7747	165.269						56	45.152	67.115	3030.34	17584	389.44
	57	56.871	32.842	1867.77	10838	190.572						57	47.048	50.451	2373.57	13773	292.744
	58	84.1	31.494	2648.62	15369	182.747						58	40.326	81.876	3301.77	19159	475.103
	59	77.723	22.763	1769.19	10266	132.084						59	86.685	105.278	9126.02	52955	610.89
	60	127.356	16.755	2133.86	12382	97.2235						60	39.982	57.086	2282.41	13244	331.249
	61	65.487	35.142	2301.37	13354	203.918						61	59.8	55.746	3333.66	19344	323.478
	62	65.487	35.142	2301.37	13354	203.918						62	25.678	65.872	1691.47	9815	382.234
	63	96.163	18.387	1768.16	10260	106.694						63	62.902	52.066	3275.06	19004	302.121
	64	69.451	22.31	1549.47	8991	129.458						64	55.664	67.845	3776.56	21914	393.684
	65	99.265	23.059	2288.96	13282	133.803						65	38.258	73.887	2826.82	16403	428.747
	66	74.621	23.799	1775.92	10305	138.098						66	45.324	54.407	2465.95	14309	315.705
	67	76	19.125	1453.48	8434	110.974						67	57.732	60.549	3495.65	20284	351.348
	68	74.966	16.416	1230.65	7141	95.2565						68	61.696	44.207	2727.38	15826	256.516
	69	91.165	23.348	2128.51	12351	135.48						69	35.501	85.214	3025.17	17554	494.465
	70	53.941	33.872	1827.1	10602	196.548						70	33.433	87.758	2934.01	17025	509.227
	71	43.601	33.281	1451.06	8420	193.115						71	48.943	88.113	4312.52	25024	511.289
	72	81.515	24.34	1984.1	11513	141.238						72	59.628	62.231	3710.72	21532	361.106
	73	86.512	54.952	4754.04	27586	318.869						73	53.941	114.927	6199.25	35972	666.877
	74	106.848	52.6	5620.2	32612	305.219						74	121.841	53.018	6459.82	37484	307.647
	75	111.501	41.124	4585.33	26607	238.626						75	49.116	61.933	3041.89	17651	359.374
	76	59.111	21.3	1259.08	7306	123.598						76	33.433	81.794	2734.62	15868	474.621
	77	169.578	14.019	2377.37	13795	81.349						77	35.501	69.291	2459.91	14274	402.073
	78	98.059	29.246	2867.83	16641	169.704						78	43.429	65.873	2860.77	16600	382.233
	79	59.973	26.695	1600.99	9290	154.903						79	50.667	75.35	3817.74	22153	437.227
	80	114.086	25.802	2943.66	17081	149.72
	81	135.628	19.044	2582.96	14988	110.508
	82	181.814	18.289	3325.21	19295	106.125
	83	92.716	22.413	2078.02	12058	130.053
	84	56.871	20.327	1156.03	6708	117.951
	85	71.691	25.863	1854.16	10759	150.075
	86	133.388	22.487	2999.5	17405	130.484
	87	93.75	31.647	2966.93	17216	183.637
	88	125.46	17.758	2227.95	12928	103.045
	89	82.549	33.962	2803.55	16268	197.071
	90	99.437	22.121	2199.69	12764	128.363
	91	111.673	20.529	2292.58	13303	119.125
	92	65.66	41.564	2729.1	15836	241.182
	93	124.598	16.477	2053.03	11913	95.6115
	94	56.009	28.403	1590.83	9231	164.813
	95	73.587	17.215	1266.84	7351	99.8954
	96	44.807	30.631	1372.48	7964	177.74
	97	48.599	31.291	1520.69	8824	181.568
	98	68.245	35.217	2403.39	13946	204.352
	99	65.66	20.339	1335.43	7749	118.017
	100	91.855	29.844	2741.34	15907	173.175
	101	42.222	27.551	1163.26	6750	159.869
	102	92.544	20.125	1862.43	10807	116.777
	103	43.946	19.82	870.983	5054	115.005
	104	133.388	27.191	3626.97	21046	157.78
	105	140.453	17.568	2467.5	14318	101.942
	106	87.202	35.457	3091.87	17941	205.741
	107	80.136	26.14	2094.74	12155	151.68
	108	106.676	31.04	3311.25	19214	180.115
	109	80.481	23.418	1884.66	10936	135.883
	110	124.254	35.444	4404.03	25555	205.667
	111	100.299	36.715	3682.46	21368	213.043
	112	117.016	29.18	3414.48	19813	169.319
	113	133.043	34.224	4553.27	26421	198.59

## Sheet: Fig. 3
Fig. 3B
Experiment: CMA3 fluorescent count per mature sperm head isolated from female spermatheca
Sperm derived from wMel- males	Area	Mean	IntDens	RawIntDens	CTCF			Sperm derived from wMel+ males	Area	Mean	IntDens	RawIntDens	CTCF
1	6.895	41.36	285.185	16420	2381.44			1	12.713	43.466	552.602	31817	2502.71
2	9.587	36.545	350.367	20173	2104.2			2	9.778	59.208	578.95	33334	3409.08
3	2.327	39.97	93.024	5356	2301.68			3	11.15	41.022	457.407	26336	2361.97
4	7.729	22.126	171.007	9846	1273.9			4	4.967	49.888	247.809	14268	2872.56
5	8.163	34.334	280.27	16137	1976.85			5	5.853	64.107	375.221	21604	3691.1
6	4.307	51.952	223.771	12884	2991.41			6	9.309	49.424	460.099	26491	2845.74
7	5.158	41.707	215.139	12387	2401.51			7	15.979	58.828	939.998	54122	3387.07
8	1.459	50.31	73.398	4226	2896.5			8	7.781	58.085	451.954	26022	3344.3
9	7.694	25.018	192.491	11083	1440.47			9	6.652	85.755	570.439	32844	4937.46
10	5.228	27.535	143.947	8288	1585.31			10	5.523	44.975	248.399	14302	2589.53
11	10.317	49.599	511.7	29462	2855.68			11	3.786	35.266	133.526	7688	2030.64
12	6.982	42.396	296.005	17043	2440.99			12	5.87	35.243	206.889	11912	2029.3
13	4.967	30.587	151.936	8748	1761.22			13	8.962	35.492	318.08	18314	2043.52
14	6.774	30.772	208.435	12001	1771.63			14	6.183	38.562	238.43	13728	2220.28
15	5.731	30.082	172.414	9927	1732.16			15	2.848	50.037	142.523	8206	2881.32
16	8.337	26.5	220.923	12720	1525.73			16	4.933	48.789	240.653	13856	2808.84
17	10.282	27.583	283.604	16329	1588.12			17	5.263	45.941	241.764	13920	2644.88
18	8.406	25.746	216.424	12461	1482.39			18	5.506	47.751	262.902	15137	2749.18
19	2.709	22.314	60.458	3481	1284.98			19	5.349	47.237	252.689	14549	2719.95
20	6.374	42.03	267.904	15425	2419.99			20	7.52	38.164	287.008	16525	2197.47
21	5.697	44.28	252.255	14524	2549.41			21	4.933	39.743	196.034	11287	2288.06
22	4.047	33.481	135.489	7801	1927.6			22	7.555	47.977	362.473	20870	2762.41
23	12.227	46.43	567.712	32687	2673.35			23	5.627	46.556	261.981	15084	2680.65
24	12.488	26.634	332.6	19150	1533.47			24	3.717	49.832	185.214	10664	2868.98
25	9.136	21.373	195.253	11242	1230.52			25	9.552	41.582	397.209	22870	2394.26
26	8.945	18.216	162.93	9381	1048.74			26	6.305	39.24	247.392	14244	2259.16
27	8.059	37.347	300.972	17329	2150.27			27	7.52	36.538	274.781	15821	2103.86
28	6.235	25.487	158.918	9150	1467.52			28	8.059	43.269	348.7	20077	2491.25
29	2.171	30.704	66.659	3838	1767.85			29	8.615	36.325	312.922	18017	2091.35
30	2.588	42.698	110.496	6362	2458.27			30	12.192	32.194	392.52	22600	1853.67
31	2.779	33.55	93.232	5368	1931.63			31	12.766	30.83	393.562	22660	1775.03
32	10.612	36.89	391.478	22540	2124.01			32	10.404	33.568	349.221	20107	1932.62
33	6.496	37.139	241.243	13890	2138.24			33	7.364	30.432	224.101	12903	1752.17
34	6.652	38.178	253.957	14622	2198.14			34	7.086	41.951	297.273	17116	2415.47
35	7.104	24.716	175.575	10109	1423			35	11.428	35.54	406.154	23385	2046.29
36	4.62	31.647	146.205	8418	1822.08			36	10.525	36.026	379.181	21832	2074.3
37	4.672	31.52	147.264	8479	1814.85			37	8.215	41.858	343.872	19799	2410.1
38	3.126	41.422	129.497	7456	2385.16			38	9.605	32.508	312.227	17977	1871.63
39	3.039	28.469	86.528	4982	1639.36			39	6.478	26.834	173.838	10009	1545.08
40	10.855	36.384	394.951	22740	2094.89			40	5.019	42.215	211.891	12200	2430.76
41	6.6	28.863	190.494	10968	1661.82			41	5.801	35.216	204.284	11762	2027.58
42	5.245	32.579	170.885	9839	1875.88			42	7.868	30.419	239.333	13780	1751.4
43	7.711	29.982	231.205	13312	1726.36			43	11.185	34.34	384.096	22115	1977.2
44	8.493	38.442	326.486	18798	2213.35			44	4.637	29.64	137.451	7914	1706.71
45	2.362	35.787	84.531	4867	2060.54			45	9.466	36.495	345.452	19890	2101.2
46	4.55	22.916	104.278	6004	1319.56			46	8.094	41.532	336.143	19354	2391.15
47	14.068	30.73	432.31	24891	1769.33			47	8.18	36.374	297.551	17132	2094.38
48	5.731	31.897	182.817	10526	1836.68			48	8.754	43.591	381.578	21970	2509.71
49	5.905	33.159	195.808	11274	1909.23			49	8.91	33.53	298.749	17201	1930.53
50	13.304	35.927	477.971	27520	2068.55			50	4.724	42.919	202.756	11674	2471.21
51	4.898	39.947	195.652	11265	2299.92			51	6.235	41.201	256.892	14791	2372.25
52	6.478	48.925	316.951	18249	2817.07			52	13.86	33.029	457.772	26357	1901.66
53	17.854	21.385	381.821	21984	1231.32			53	5.193	40.689	211.301	12166	2342.77
54	9.622	28.643	275.598	15868	1649.14			54	7.121	39.288	279.766	16108	2262.04
55	8.094	31.485	254.825	14672	1812.7			55	7.573	46.213	349.951	20149	2660.64
56	6.114	44.892	274.451	15802	2584.56			56	9.066	38.529	349.308	20112	2218.4
57	7.625	27.478	209.512	12063	1582.03			57	10.942	31.36	343.142	19757	1805.61
58	6.808	22.679	154.403	8890	1305.82			58	12.47	76.919	959.208	55228	4428.87
59	26.712	30.726	820.766	47257	1769.13			59	11.515	35.204	405.372	23340	2026.92
60	21.953	29.96	657.714	37869	1725			60	9.622	50.545	486.343	28002	2910.21
61	9.344	32.1	299.948	17270	1848.24			61	12.679	42.171	534.678	30785	2428.03
62	16.552	36.858	610.073	35126	2122.16			62	7.729	43.551	336.595	19380	2507.44
63	8.458	28.199	238.517	13733	1623.67			63	6.305	36.708	231.43	13325	2113.4
64	6.235	59.075	368.343	21208	3401.44			64	3.352	48.016	160.951	9267	2764.62
65	15.562	31.335	487.628	28076	1804.14			65	15.023	47.195	709.037	40824	2717.43
66	12.019	42.822	514.67	29633	2465.51			66	12.592	59.654	751.155	43249	3434.64
67	11.758	40.38	474.793	27337	2324.97			67	15.353	48.74	748.324	43086	2806.36
68	41.319	38.282	1581.79	91074	2204.17			68	10.074	68.134	686.354	39518	3922.77
69	20.06	55.175	1106.82	63727	3176.82			69	5.384	53.623	288.711	16623	3087.48
70	18.775	49.806	935.101	53840	2867.64			70	8.094	62.013	501.904	28898	3570.3
71	15.753	39.411	620.841	35746	2269.16			71	9.935	38.705	384.513	22139	2228.38
72	12.939	22.965	297.151	17109	1322.28			72	7.329	41.69	305.558	17593	2400.46
73	5.575	31.43	175.227	10089	1809.69			73	11.133	41.005	456.504	26284	2360.91
74	7.138	29.985	214.045	12324	1726.53			74	14.78	45.696	675.395	38887	2631.06
75	11.046	57.973	640.381	36871	3337.95			75	6.652	51.872	345.053	19867	2986.62
76	8.007	29.232	234.053	13476	1683.03			76	17.386	39.593	688.351	39633	2279.59
77	6.565	30.632	201.106	11579	1763.75			77	7.989	38.854	310.421	17873	2237.2
78	17.733	19.06	337.984	19460	1097.39			78	7.364	57.111	420.569	24215	3288.29
79	10.282	29.855	306.964	17674	1718.93			79	12.262	48.021	588.832	33903	2764.88
80	10.508	35.319	371.122	21368	2033.5			80	5.558	63.316	351.896	20261	3645.38
81	11.654	47.088	548.764	31596	2711.17			81	13.165	49.067	645.973	37193	2825.14
82	8.615	50.593	435.836	25094	2912.83			82	5.141	31.25	160.655	9250	1799.26
83	6.339	55.995	354.97	20438	3224.17			83	25.271	32.115	811.578	46728	1849.08
84	3.144	67.436	211.995	12206	3882.32			84	8.892	56.01	498.066	28677	3225.03
85	6.982	49.104	342.847	19740	2827.27			85	15.249	34.972	533.289	30705	2013.57
86	6.635	52.306	347.033	19981	3011.45			86	3.248	31.818	103.34	5950	1831.9
87	11.515	44.531	512.777	29524	2563.96			87	4.603	48.838	224.778	12942	2811.64
88	4.585	55.36	253.835	14615	3187.57			88	17.038	38.185	650.593	37459	2198.56
89	7.295	50.083	365.339	21035	2883.48			89	6.895	41.151	283.743	16337	2369.4
90	6.235	48.474	302.24	17402	2791.02			90	8.476	36.416	308.649	17771	2096.63
91	8.406	36.357	305.627	17597	2093.39			91	8.632	36.72	316.969	18250	2114.23
92	4.724	56.757	268.129	15438	3267.99			92	6.044	41.086	248.33	14298	2365.65
93	5.523	34.289	189.382	10904	1974.29			93	6.53	52.093	340.19	19587	2999.54
94	8.997	62.519	562.467	32385	3599.53			94	11.654	32.641	380.397	21902	1879.35
95	8.146	47.392	386.042	22227	2728.58			95	8.111	43.351	351.618	20245	2495.99
96	7.746	39.07	302.64	17425	2249.55			96	4.099	49.788	204.076	11750	2866.55
97	3.092	55.197	170.642	9825	3177.55			97	8.545	49.514	423.105	24361	2850.91
98	6.6	56.608	373.606	21511	3259.24			98	8.875	49.36	438.077	25223	2842.03
99	3.474	57.285	198.987	11457	3297.93			99	4.429	78.027	345.574	19897	4492.44
100	7.451	49.457	368.5	21217	2847.54			100	5.21	79.57	414.595	23871	4581.77
101	7.069	36.83	260.348	14990	2120.53			101	12.175	53.049	645.869	37187	3054.37
102	11.828	37.382	442.141	25457	2152.27			102	19.035	36.473	694.274	39974	2100.03
103	8.007	68.371	547.426	31519	3936.43			103	15.058	47.806	719.875	41448	2752.56
104	6.583	57.934	381.352	21957	3335.41			104	5.332	51.906	276.761	15935	2988.56
105	5.349	65.315	349.395	20117	3760.89			105	5.506	46.625	256.701	14780	2684.34
106	12.991	36.495	474.115	27298	2101.3			106	17.854	48.967	874.277	50338	2819.42
107	9.431	49.652	468.262	26961	2858.76			107	24.524	35.578	872.506	50236	2048.44
108	14.659	38.932	570.7	32859	2241.56			108	21.623	52.428	1133.67	65273	3018.68
109	12.071	71.314	860.817	49563	4105.96			109	7.451	43.103	321.154	18491	2481.68
110	15.093	48.194	727.395	41881	2774.86			110	25.826	36.699	947.797	54571	2113.03
111	16.031	16.8	269.31	15506	967.251			111	8.545	45.293	387.032	22284	2607.84
112	16.673	17.391	289.961	16695	1001.32			112	4.603	65.642	302.119	17395	3779.06
113	0.017	25	0.434	25	1470.59			113	13.287	62.075	824.761	47487	3573.94
114	7.781	27.368	212.951	12261	1575.76			114	15.892	28.799	457.668	26351	1658.13
115	21.154	21.539	455.636	26234	1240.14			115	9.379	65.704	616.222	35480	3782.92
116	13.443	21.672	291.333	16774	1247.79			116	10.004	42.611	426.284	24544	2453.42
117	12.713	28.822	366.433	21098	1659.56			117	11.776	52.226	614.988	35409	3006.88
118	19.105	24.921	476.113	27413	1434.86			118	11.341	61.118	693.162	39910	3519.09
119	27.251	15.816	431.008	24816	910.645			119	8.684	41.054	356.516	20527	2363.77
120	9.813	32.796	321.832	18530	1888.31			120	12.731	49.576	631.141	36339	2854.37
121	6.461	32.263	208.452	12002	1857.61			121	13.026	52.501	683.888	39376	3022.88
122	5.263	28.409	149.505	8608	1635.57			122	3.543	55.412	196.329	11304	3190.52
123	7.573	29.083	220.228	12680	1674.37			123	10.16	57.949	588.78	33900	3336.61
124	8.962	29.957	268.477	15458	1724.84			124	9.5	52.399	497.806	28662	3017.05
125	12.818	27.444	351.774	20254	1580.12			125	6.93	73.602	510.05	29367	4237.66
126	12.713	28.825	366.468	21100	1659.72			126	16.552	59.744	988.872	56936	3439.83
127	2.97	21.117	62.716	3611	1215.82			127	10.23	59.973	613.512	35324	3452.98
128	10.577	23	243.276	14007	1324.29			128	6.2	50.759	314.728	18121	2922.74
129	7.399	28.836	213.35	12284	1660.22			129	9.726	72.936	709.384	40844	4199.47
								130	27.094	49.865	1351.07	77790	2871.12
								131	9.761	71.774	700.579	40337	4132.47
								132	9.361	75.221	704.174	40544	4331.16
								133	6.6	42.666	281.59	16213	2456.52
								134	8.146	87.753	714.803	41156	5052.3
								135	17.281	83.796	1448.1	83377	4824.78
								136	10.351	74.44	770.555	44366	4286.16
								137	10.456	69.865	730.487	42059	4022.48
								138	8.476	58.213	493.394	28408	3351.58
								139	5.523	79.192	437.382	25183	4559.66
								140	16.118	50.929	820.853	47262	2932.25
								141	16.534	58.132	961.187	55342	3347.16
								142	16.083	55.18	887.46	51097	3177.08
								143	6.635	61.045	405.008	23319	3514.54
								144	8.076	66.912	540.392	31114	3852.65
								145	10.021	52.36	524.726	30212	3014.87
								146	10.282	66.448	683.21	39337	3825.81
								147	8.371	52.336	438.129	25226	3013.5
								148	5.975	73.253	437.66	25199	4217.41
								149	3.3	75.537	249.268	14352	4349.09
								150	16.795	69.858	1173.27	67553	4022.21
								151	8.684	95.498	829.311	47749	5498.5

## Sheet: Fig. S4
Fig. S4
Experiment: Ct values of cif gene expression in Aedes aegypti embryos (0-2 hrs AED)
	Sample	Ct CifA	Ct Groel	Ct CifB
	AA_01	20.1342	20.6267	23.992
	AA_01	20.0358	20.7365	24.0317
	AA_02	18.8415	20.0549	22.7743
	AA_02	18.5543	20.0525	22.5572
	AA_03	18.8511	21.6557	22.7216
	AA_03	18.7599	20.5335	22.8737
	AA_04	18.9665	20.6131	22.7575
	AA_04	19.1547	20.9444	22.6974
	AA_05	18.3643	19.2266	21.9213
	AA_05	18.5634	19.8564	21.9808
	AA_06	19.1076	19.9505	22.6222
	AA_16	19.2289	20.4765	22.6397
	AA_07	18.7515	20.1496	22.4969
	AA_07	18.9005	21.1031	22.9111
	AA_08	18.7333	19.9202	22.2811
	AA_08	19.4877	20.6815	22.5495
	AA_09	18.7279	19.9534	21.9656
	AA_09	18.697	20.7067	22.4067
	AA_10	19.7645	20.2701	22.829
	AA_10	19.6832	20.9449	23.1546
	AA_11	18.7756	19.3488	21.7712
	AA_11	18.7133	20.0456	21.7265
	AA_12	19.1828	19.8624	22.1768
	AA_12	19.1157	21.4382	22.4257
	AA_13 -RT	31.171	Undetermined	Undetermined
	AA_13 -RT	32.0042	Undetermined	Undetermined
	AA_14 -RT	31.8134	Undetermined	36.8151
	AA_14 -RT	31.4671	35.351	Undetermined
