# Supplementary material for: The mechanism of cytoplasmic incompatibility is conserved in Wolbachia-infected Aedes aegypti mosquitoes deployed for arbovirus control
Source: PLoS Biol. 2024 Mar 28;22(3):e3002573. doi: 10.1371/journal.pbio.3002573 (PMC11014437; doi:10.1371/journal.pbio.3002573)
Supplement: S1 Table — (XLSX) [file pbio.3002573.s007.xlsx]

## Sheet: Table S1
Table S1. P-values associated with all statistical comparisons made for quantification data
Fig. 2B	Pairwise comparisons
	Core histone signal intensity, wMel- vs. wMel+	Mann Whitney test
		P value	<0.0001
		Exact or approximate P value?	Exact
		P value summary	****
		Significantly different (P < 0.05)?	Yes
		One- or two-tailed P value?	Two-tailed
		Sum of ranks in column A,B	2276 , 9049
		Mann-Whitney U	260
		Difference between medians
		Median of column A	1867, n=63
		Median of column B	3764, n=87
		Difference: Actual	1898
		Difference: Hodges-Lehmann	2084
Fig. 2C	Pairwise comparisons	Mann Whitney test
	% Mature sperm with puncta, wMel- vs. wMel+	P value	<0.0001
		Exact or approximate P value?	Exact
		P value summary	****
		Significantly different (P < 0.05)?	Yes
		One- or two-tailed P value?	Two-tailed
		Sum of ranks in column A,B	55 , 155
		Mann-Whitney U	0
		Difference between medians
		Median of column A	0.000, n=10
		Median of column B	92.60, n=10
		Difference: Actual	92.6
		Difference: Hodges-Lehmann	86.75
Fig. 2E	Pairwise comparisons	Mann Whitney test
	CMA3 intensity per mature sperm in males, wMel- vs. wMel+	P value	<0.0001
		Exact or approximate P value?	Exact
		P value summary	****
		Significantly different (P < 0.05)?	Yes
		One- or two-tailed P value?	Two-tailed
		Sum of ranks in column A,B	6867 , 11661
		Mann-Whitney U	426
		Difference between medians
		Median of column A	169.7, n=113
		Median of column B	361.1, n=79
		Difference: Actual	191.4
		Difference: Hodges-Lehmann	187.1
Fig. 3B	Pairwise comparisons	Mann Whitney test
	CMA3 intensity per mature sperm in females, wMel- vs. wMel+	P value	<0.0001
		Exact or approximate P value?	Approximate
		P value summary	****
		Significantly different (P < 0.05)?	Yes
		One- or two-tailed P value?	Two-tailed
		Sum of ranks in column A,B	13201 , 26139
		Mann-Whitney U	4816
		Difference between medians
		Median of column A	1974, n=129
		Median of column B	2717, n=151
		Difference: Actual	743.1
		Difference: Hodges-Lehmann	656.6
Fig. S4	Pairwise comparisons	Mann Whitney test
	qPCR based cif gene expression in Ae. Aegypti embryos	P value	<0.0001
		Exact or approximate P value?	Exact
		P value summary	****
		Significantly different (P < 0.05)?	Yes
		One- or two-tailed P value?	Two-tailed
		Sum of ranks in column A,B	222, 78
		Mann-Whitney U	0
		Difference between medians
		Median of column A	2.421, n=12
		Median of column B	0.2339, n=12
		Difference: Actual	-2.187
		Difference: Hodges-Lehmann	-2.212
